# Supplementary material for: Bispecific T cell engager (BiTE®) antibody constructs can mediate bystander tumor cell killing
Source: PubMed Central journal article supplement (PMC5570333; doi:10.1371/journal.pone.0183390), 2017-08-24
Supplement: pone.0183390.s001.pdf [file pone.0183390.s001.pdf]

**S1 Table. FASL, Granzyme B, IL-6 and IL-1 $\beta$  expression increase upon activation of T cells with EGFR BiTE $^{\text{®}}$  and EGFR-expressing cells.**

| Cells<br>(EGFR +/-) | T cells                       | EGFR<br>BiTE $^{\text{®}}$<br>(pM) | ELISA           |                 | MSD             |                         |
|---------------------|-------------------------------|------------------------------------|-----------------|-----------------|-----------------|-------------------------|
|                     |                               |                                    | FASL<br>(pg/ml) | GZMB<br>(pg/ml) | IL-6<br>(pg/ml) | IL-1 $\beta$<br>(pg/ml) |
| NUGC4 (+)           | none                          | 0                                  | <1              | <50             | <2              | <2                      |
| NUGC4 (+)           | resting                       | 0                                  | 2.504           | <50             | <2              | <2                      |
| NUGC4 (+)           | resting                       | 4                                  | 61.81           | >1000           | 3.500           | <2                      |
| NUGC4 (+)           | resting                       | 11                                 | 80.05           | >1000           | 17.60           | 7.600                   |
| SW620 (-)           | none                          | 0                                  | <1              | <50             | <2              | <2                      |
| SW620 (-)           | resting                       | 0                                  | 1.937           | <50             | <2              | <2                      |
| SW620 (-)           | resting                       | 4                                  | 1.910           | <50             | <2              | <2                      |
| SW620 (-)           | resting                       | 11                                 | 3.304           | <50             | <2              | <2                      |
| NUGC4 (+)           | BiTE $^{\text{®}}$ -activated | 0                                  | 76.85           | >1000           | <2              | <2                      |
| NUGC4 (+)           | BiTE $^{\text{®}}$ -activated | 4                                  | 242.4           | >1000           | 3.800           | <2                      |
| NUGC4 (+)           | BiTE $^{\text{®}}$ -activated | 11                                 | 368.1           | >1000           | 12.80           | 5.600                   |
| SW620 (-)           | BiTE $^{\text{®}}$ -activated | 0                                  | 57.59           | >1000           | <2              | <2                      |
| SW620 (-)           | BiTE $^{\text{®}}$ -activated | 4                                  | 55.47           | >1000           | <2              | <2                      |
| SW620 (-)           | BiTE $^{\text{®}}$ -activated | 11                                 | 59.69           | >1000           | <2              | <2                      |
| Assay Range (pg/ml) |                               |                                    | 1 -<br>1000     | 50 -<br>1000    | 2 -<br>10000    | 2 -<br>10000            |
